# Supplementary material for: KCNQ1OT1 promotes autophagy by regulating miR‐200a/FOXO3/ATG7 pathway in cerebral ischemic stroke
Source: PubMed Central journal article supplement (PMC6516167; doi:10.1111/acel.12940), 2019-04-03
Supplement: ACEL-18-e12940-s001.pdf [file ACEL-18-e12940-s001.pdf]

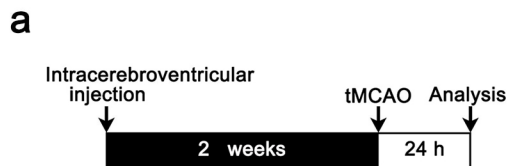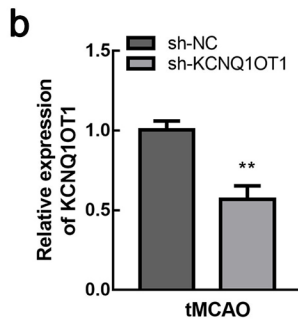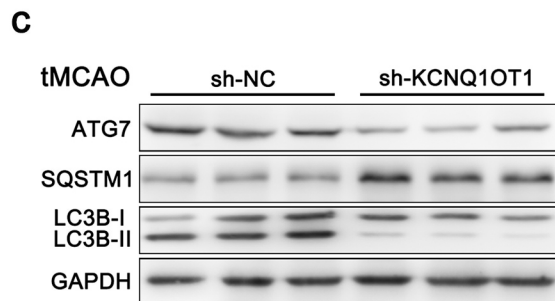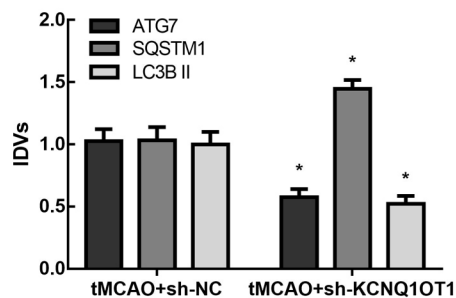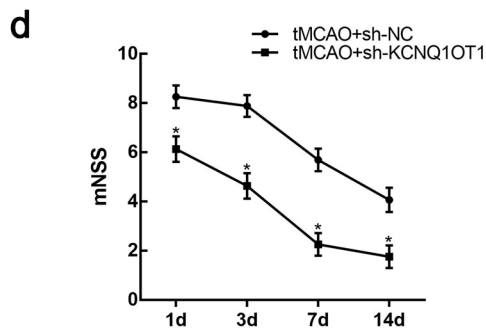

Fig S1
